# Supplementary material for: The relationship of recombination rate, genome structure, and patterns of molecular evolution across angiosperms
Source: PubMed Central journal article supplement (PMC4574184; doi:10.1186/s12862-015-0473-3), 2015-09-16
Supplement: 12862_2015_473_MOESM3_ESM.pdf [file 12862_2015_473_MOESM3_ESM.pdf]

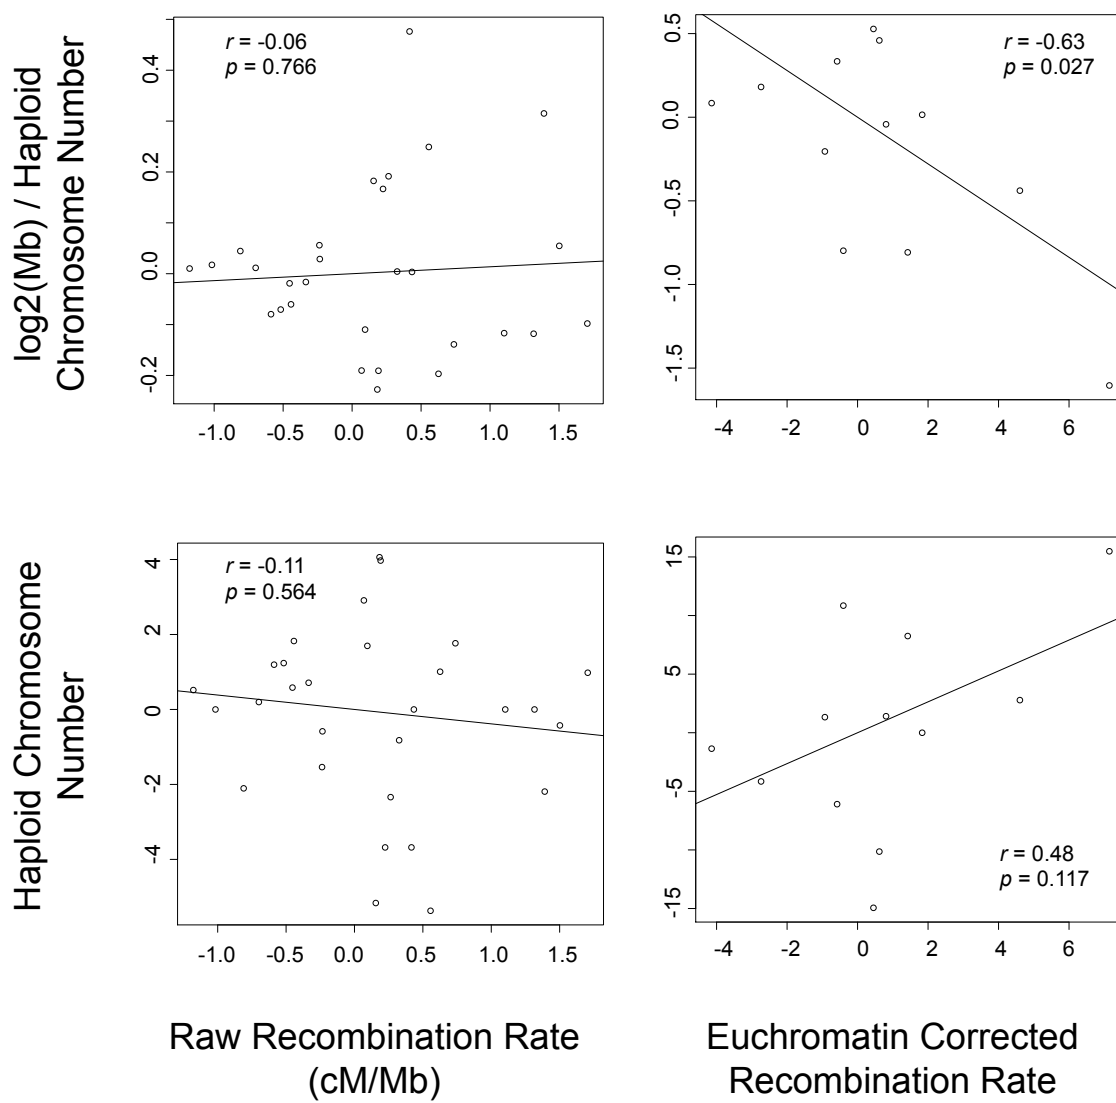

Figure S1 - Independent contrast plots of recombination rate vs genome compactness and chromosome number. Lines on each plot are the best-fit linear regression. The Pearson's correlation coefficient ( $r$ ) and p-value ( $p$ ) are given on each plot.

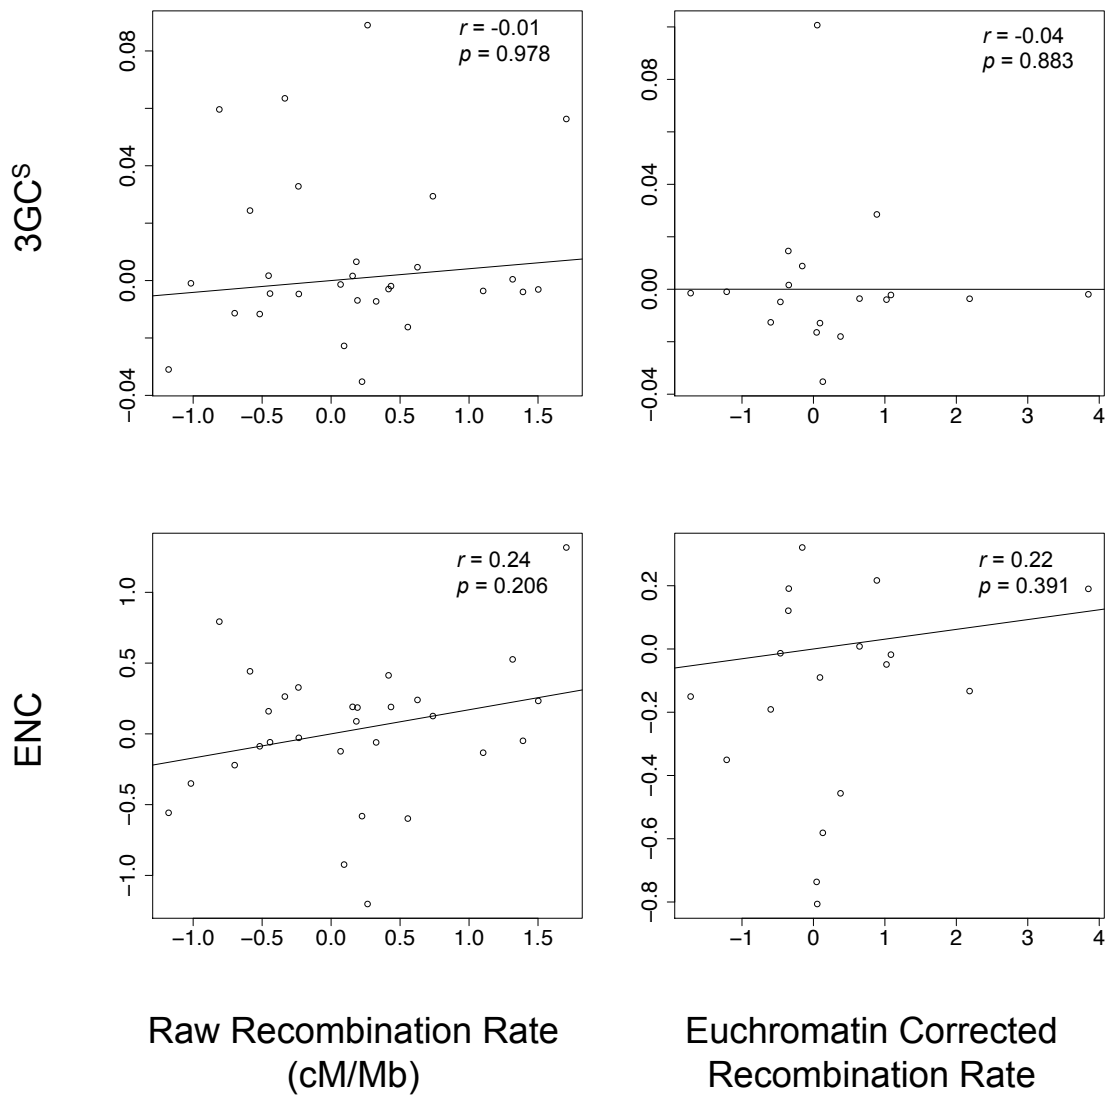

Figure S2 - Independent contrast plots of recombination rate vs GC content at 3<sup>rd</sup> position synonymous sites (3GC<sup>S</sup>) and codon bias (ENC). Lines on each plot are the best-fit linear regression. The Pearson's correlation coefficient ( $r$ ) and p-value ( $p$ ) are given on each plot.
